# Supplementary material for: Can High-Fidelity Patient Simulation Be Used for Skill Development in Junior Undergraduate Students: A Quasi-Experimental Study
Source: MDPI journal article supplement (doi:10.3390/healthcare11152221), 2023-08-07
Supplement: s1 [file s1]

Table S1. Differences between standard HFPS and HFPS with structured guideline

| Stages            | Characteristics                                                                                               | Standard HFPS (An educator was responsible for this group)                                                                                                                                                                                           | HFPS with structured guideline (Another educator was responsible for this group)                                                                                                                                                                                                                                  |
|-------------------|---------------------------------------------------------------------------------------------------------------|------------------------------------------------------------------------------------------------------------------------------------------------------------------------------------------------------------------------------------------------------|-------------------------------------------------------------------------------------------------------------------------------------------------------------------------------------------------------------------------------------------------------------------------------------------------------------------|
| Pre-simulation    | Pre-simulation study                                                                                          | <ul style="list-style-type: none"> <li>No consensus.</li> <li>Students may receive preparatory materials for simulation provided by the educator.</li> </ul>                                                                                         | Pre-simulation reading materials will be sent to students. Students are required to read the materials before simulation lab.                                                                                                                                                                                     |
|                   | Simulated case scenario                                                                                       | The course coordinator will only upload the case scenario with brief information to students                                                                                                                                                         | The case scenario information and condition in 3 stages (for 3 small groups individually) will be sent to the students.                                                                                                                                                                                           |
|                   | Pre-briefing of the simulation lab and the instruction of the simulation including roles and responsibilities | No consensus and depending on the responsible lab teachers.                                                                                                                                                                                          | The educator will introduce the simulation lab environment as well as students' and educator's roles and responsibilities.                                                                                                                                                                                        |
| During simulation | Performing in HFPS                                                                                            | <ul style="list-style-type: none"> <li>Students are divided into 3 small groups and expected to perform nursing care and skill practice to the simulated case.</li> <li>Students are expected to apply their learned knowledge and skills</li> </ul> | <ul style="list-style-type: none"> <li>Students are divided into 3 small groups and expected to perform nursing care and skill practice to the simulated case.</li> <li>Students are expected to apply their learned knowledge and skills.</li> </ul>                                                             |
|                   | Time period of simulation performance                                                                         | 15 to 20 minutes                                                                                                                                                                                                                                     | 20 minutes                                                                                                                                                                                                                                                                                                        |
|                   | Behavior/ tasks of students who are observers.                                                                | <ul style="list-style-type: none"> <li>No consensus</li> <li>Self-manage or some tasks will be given by the educator</li> </ul>                                                                                                                      | <ul style="list-style-type: none"> <li>Students are required to record the areas that have been well performed and that must be improved regarding their observation of the students in HFS.</li> <li>Students will have the guiding questions to let them understand more about the roles of players.</li> </ul> |
| Post-simulation   | Debriefing                                                                                                    | Mainly students will listen to the feedback from the educators.                                                                                                                                                                                      | <ul style="list-style-type: none"> <li>All students will be required to give comments on the performance of the group in HFS.</li> <li>Individual students will be requested to reflect their performance.</li> <li>The educator will give comments on overall student performance for improvement.</li> </ul>    |
